# Supplementary material for: Light-Induced Clusterization of Gold Nanoparticles: A New Photo-Triggered Antibacterial against E. coli Proliferation
Source: MDPI journal article supplement (doi:10.3390/nano13040746), 2023-02-16
Supplement: s1 [file s1]

## Supplementary information

### Light-induced clusterization of Gold Nanoparticles: a new Pathogen-responsive candidate against *E. Coli* Infection

<sup>1,2</sup>Angela Candreva, <sup>2</sup>Renata De Rose, <sup>3</sup>Ida Daniela Perrotta, <sup>2,4</sup>Alexa Guglielmelli and <sup>1,2</sup>Massimo La Deda\*

<sup>1</sup> Department of Chemistry and Chemical Technologies, University of Calabria, 87036 Rende, CS, Italy; <sup>2</sup> CNR-NANOTEC, Institute of Nanotechnology U.O.S, Cosenza, 87036 Rende, CS, Italy; <sup>3</sup> Department of Biology, Ecology and Earth Sciences, Centre for Microscopy and Microanalysis (CM2), University of Calabria, 87036 Rende, CS, Italy; <sup>4</sup> Department of Physics, NLHT-Lab, University of Calabria, 87036 Rende (CS), Italy

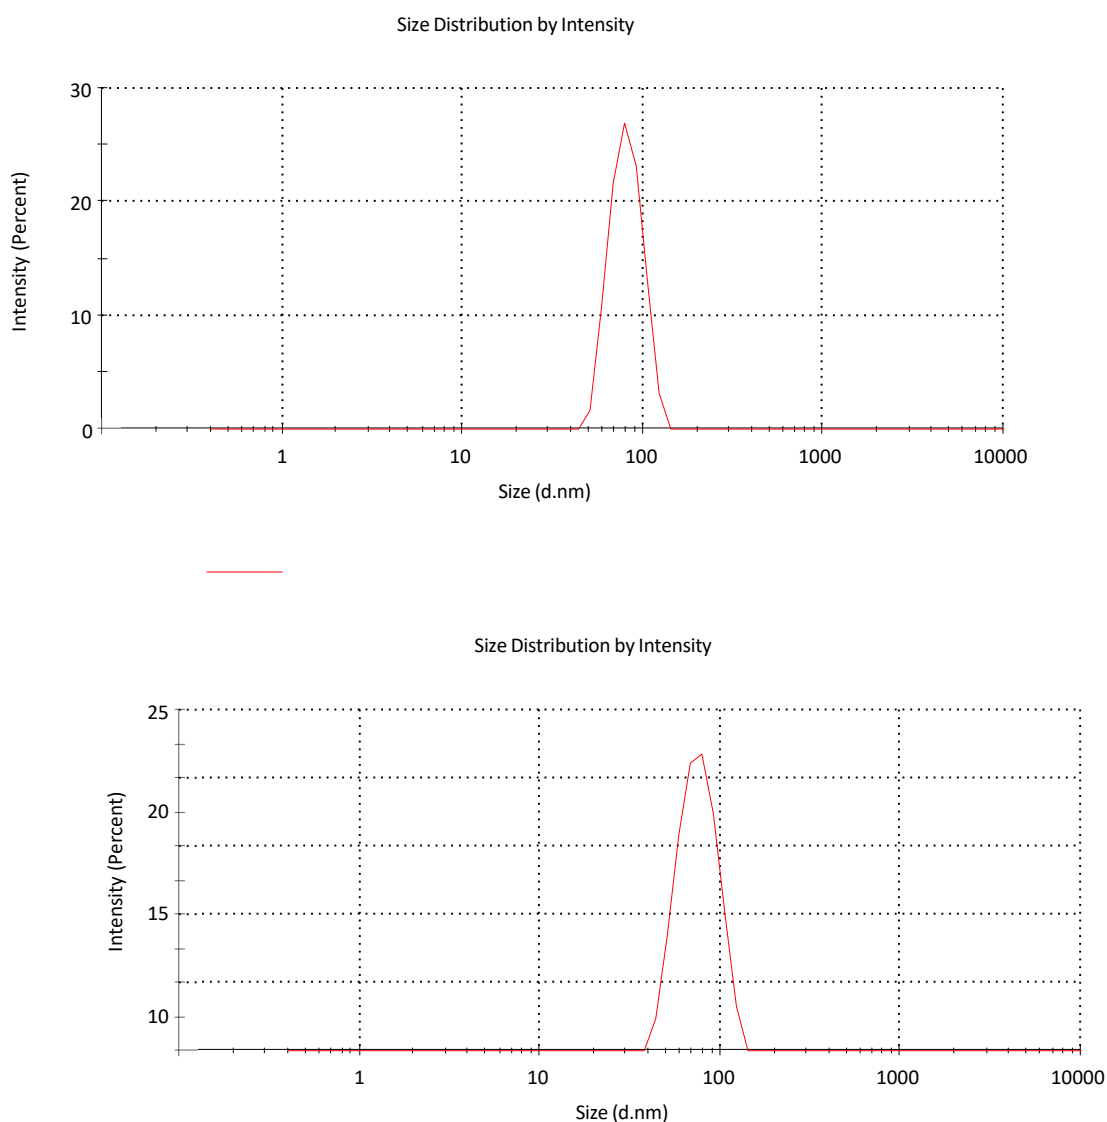

**Fig. S1** DLS measurement AuNS@PEG in water (on the top); DLS measurement AuNS@PEG in PBS (on the bottom).

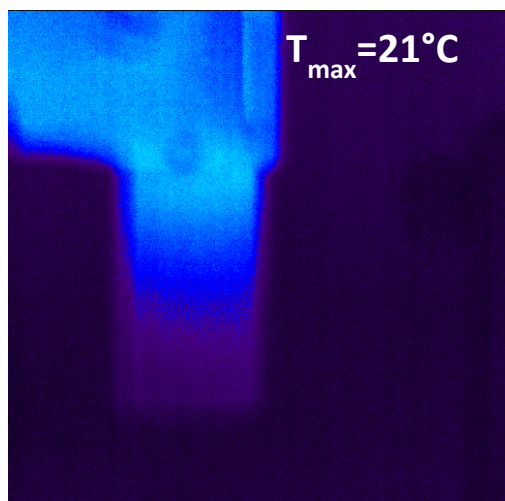

**Fig.S2** Thermal photo of AuNS@PEG-SH water solution (3.54  $\mu\text{g/mL}$ ) irradiated with a laser source for 5 min ( $\lambda= 532$  nm, 60 mW). Room temperature 19°C.

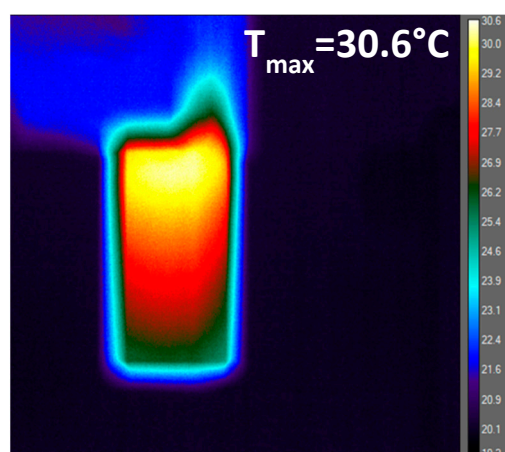

**Fig.S3** Thermal photo of AuNS@PEG-SH saturated water solution irradiated with a laser source for 5 min ( $\lambda= 532$  nm, 60 mW). Room temperature 19°C.

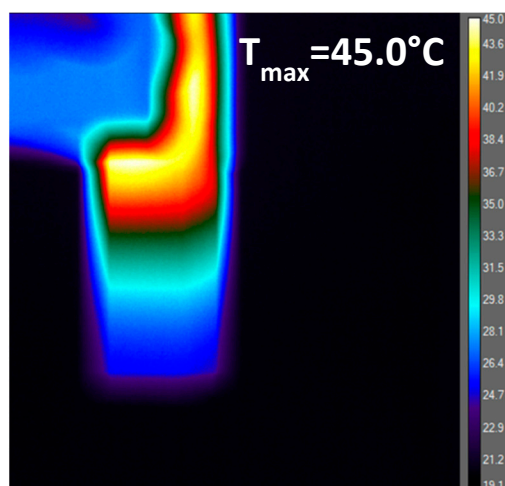

**Fig.S4** Thermal photo of AuNS@PEG-SH water solution (3.54  $\mu\text{g/mL}$ ) irradiated with a laser source for 5 min ( $\lambda= 532$  nm, 1500 mW). Room temperature 19°C.

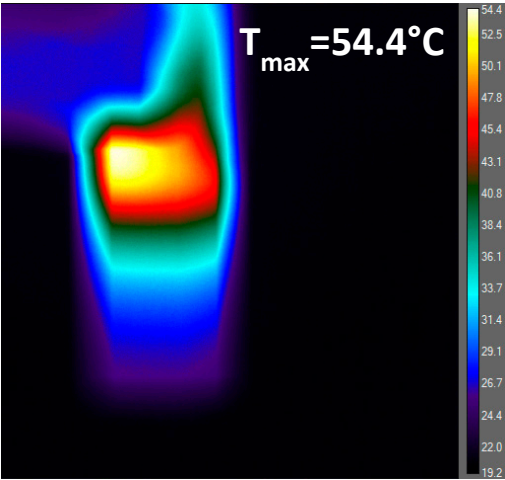

**Fig.S5** Thermal photo of AuNS@PEG-SH saturated water solution irradiated with a laser source for 5 min ( $\lambda= 532$  nm, 1500 mW). Room temperature 19°C.

**Table S1.** Each experiment was performed in duplicate and repeated 3 times. From this data population, the average and the standard deviation of the bacterial counts have been obtained and reported.

|                       | Dark condition                                                                                                                                                                                      |                    | Under irradiation                                                                                                                                                                                      |                    |
|-----------------------|-----------------------------------------------------------------------------------------------------------------------------------------------------------------------------------------------------|--------------------|--------------------------------------------------------------------------------------------------------------------------------------------------------------------------------------------------------|--------------------|
| AuNP concentration    | <i>E. coli</i> (CFU/mL)                                                                                                                                                                             | %growth inhibition | <i>E. coli</i> (CFU/mL)                                                                                                                                                                                | %growth inhibition |
| 0.26 $\mu\text{g/mL}$ | $1.9 \times 10^8$ ; $2.3 \times 10^8$<br>$2.1 \times 10^8$ ; $2.1 \times 10^8$<br>$2.3 \times 10^8$ ; $1.9 \times 10^8$<br>(Average $2.1 \times 10^8$<br>Standard deviation $0.179 \times 10^8$ )   | 0                  | $2.2 \times 10^8$ ; $2.0 \times 10^8$<br>$2.3 \times 10^8$ ; $2.0 \times 10^8$<br>$2.0 \times 10^8$ ; $2.2 \times 10^8$<br>(Average $2.12 \times 10^8$<br>Standard deviation $0.133 \times 10^8$ )     | 0                  |
| 0.39 $\mu\text{g/mL}$ | $1.8 \times 10^8$ ; $2.2 \times 10^8$<br>$2.2 \times 10^8$ ; $2.4 \times 10^8$<br>$1.95 \times 10^8$ ; $1.9 \times 10^8$<br>(Average $2.1 \times 10^8$<br>Standard deviation $0.227 \times 10^8$ )  | 0                  | $1.85 \times 10^8$ ; $2.0 \times 10^8$<br>$2.35 \times 10^8$ ; $2.4 \times 10^8$<br>$1.95 \times 10^8$ ; $1.95 \times 10^8$<br>(Average $2.08 \times 10^8$<br>Standard deviation $0.232 \times 10^8$ ) | 0                  |
| 1.56 $\mu\text{g/mL}$ | $2.0 \times 10^8$ ; $1.6 \times 10^8$<br>$1.85 \times 10^8$ ; $1.75 \times 10^8$<br>$1.9 \times 10^8$ ; $1.7 \times 10^8$<br>(Average $1.8 \times 10^8$<br>Standard deviation $0.145 \times 10^8$ ) | -15%               | $0.96 \times 10^8$ ; $1.1 \times 10^8$<br>$0.8 \times 10^8$ ; $1.0 \times 10^8$<br>$0.9 \times 10^8$ ; $1.1 \times 10^8$<br>(Average $0.977 \times 10^8$<br>Standard deviation $0.117 \times 10^8$ )   | -53%               |
| 3.54 $\mu\text{g/mL}$ | $1.4 \times 10^8$ ; $1.0 \times 10^8$<br>$0.97 \times 10^8$ ; $1.5 \times 10^8$<br>$1.1 \times 10^8$ ; $1.4 \times 10^8$<br>(Average $1.23 \times 10^8$<br>Standard deviation $0.232 \times 10^8$ ) | -46%               | $1.9 \times 10^6$ ; $1.8 \times 10^6$<br>$2.2 \times 10^6$ ; $2.1 \times 10^6$<br>$2.2 \times 10^6$ ; $2.4 \times 10^6$<br>(Average $2.1 \times 10^6$<br>Standard deviation $0.219 \times 10^6$ )      | -99%               |
